# Supplementary material for: Effects of the locality of a potential derived from hybrid density functionals on Kohn–Sham orbitals and excited states
Source: Royal Society of Chemistry journal article supplement (doi:10.1039/c7cp00704c), 2017-01-01
Supplement: c7cp00704c1.pdf [file c7cp00704c1.pdf]

Supporting Information for

**Effects of the locality of a potential derived from hybrid density functionals  
on Kohn-Sham orbitals and excited states**

Jaewook Kim,<sup>†</sup> Kwangwoo Hong,<sup>†</sup>  
Sang-Yeon Hwang, Seongok Ryu, Sunghwan Choi, and Woo Youn Kim\*

Department of Chemistry, KAIST, 291 Daehak-ro, Yuseong-gu, Daejeon 34141, Republic of  
Korea

<sup>†</sup>Jaewook Kim and Kwangwoo Hong contributed equally to this work.

\*E-mail: [wooyoun@kaist.ac.kr](mailto:wooyoun@kaist.ac.kr)

## 1. Atomization energies

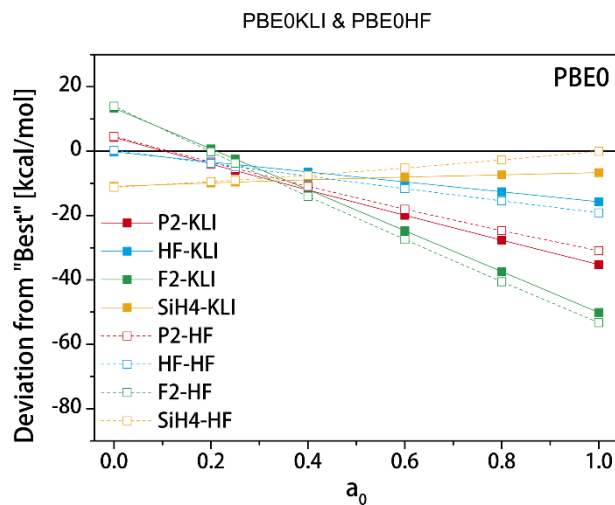

**Figure S1.** Atomization energies of  $P_2$ , HF,  $F_2$ , and  $SiH_4$  as a function of the exact exchange ratio ( $a_0$ ) with respect to the ab initio calculations [R. Haunschuld, W. Klopper, *J. Chem. Phys.* **2012**, *136*, 164102] which are denoted as “Best”.

## 2. Caricato set - Orbital energy gaps from PBE0HF- $a_0$

**Table S1.** The orbital energy gaps from PBE0HF- $a_0$  with various  $a_0$  as an approximation to each excitation energy for the Caricato set. The third column indicates the type of excitations: V and R for valence and Rydberg excitations, respectively. The experimental values were obtained from [M. Caricato, G. W. Trucks, M. J. Frisch, K. B. Wiberg, *J. Chem. Theory Comput.* **2010**, 6 (2), 370–383]. Unit: eV

| Molecule                      | State                          | Type | PBE0HF- $a_0$ (Orbital energy gap) |       |       |       |       | Expt. |      |
|-------------------------------|--------------------------------|------|------------------------------------|-------|-------|-------|-------|-------|------|
|                               |                                |      | 0.0                                | 0.2   | 0.4   | 0.6   | 0.8   |       | 1.0  |
| formaldehyde                  | 1 <sup>1</sup> A <sub>2</sub>  | V    | 3.52                               | 5.81  | 8.08  | 10.27 | 11.84 | 13.24 | 4.00 |
|                               | 1 <sup>1</sup> B <sub>2</sub>  | R    | 5.78                               | 7.35  | 8.83  | 10.26 | 11.66 | 13.07 | 7.08 |
|                               | 2 <sup>1</sup> B <sub>2</sub>  | R    | 6.36                               | 7.69  | 9.07  | 10.47 | 11.87 | 13.27 | 7.97 |
|                               | 2 <sup>1</sup> A <sub>1</sub>  | R    | 6.34                               | 7.68  | 9.02  | 10.38 | 11.76 | 13.16 | 8.14 |
|                               | 2 <sup>1</sup> A <sub>2</sub>  | R    | 6.43                               | 7.75  | 9.10  | 10.49 | 12.31 | 13.84 | 8.37 |
|                               | 3 <sup>1</sup> B <sub>2</sub>  | R    | 6.41                               | 7.76  | 9.12  | 10.50 | 11.91 | 13.33 | 8.88 |
|                               | 1 <sup>1</sup> B <sub>1</sub>  | V    | 8.27                               | 10.78 | 13.25 | 15.63 | 17.39 | 18.96 | 9.00 |
|                               | 3 <sup>1</sup> A <sub>2</sub>  | R    | 6.88                               | 14.49 | 9.65  | 11.05 | 12.50 | 14.06 | 9.22 |
|                               | 4 <sup>1</sup> B <sub>2</sub>  | R    | 6.71                               | 8.10  | 9.50  | 10.94 | 12.38 | 13.81 | 9.26 |
|                               | 4 <sup>1</sup> A <sub>1</sub>  | R    | 6.81                               | 8.18  | 9.57  | 10.97 | 12.37 | 13.79 | 9.58 |
| 5 <sup>1</sup> B <sub>2</sub> | R                              | 6.76 | 13.79                              | 9.61  | 11.01 | 12.41 | 13.83 | 9.63  |      |
| acetaldehyde                  | 1 <sup>1</sup> A''             | V    | 3.87                               | 6.12  | 8.37  | 10.58 | 12.52 | 15.14 | 4.28 |
|                               | 2 <sup>1</sup> A'              | R    | 5.38                               | 6.95  | 8.45  | 9.87  | 11.25 | 12.63 | 6.82 |
|                               | 3 <sup>1</sup> A'              | R    | 5.89                               | 7.31  | 8.65  | 10.00 | 11.35 | 12.72 | 7.46 |
|                               | 4 <sup>1</sup> A'              | R    | 6.04                               | 7.35  | 8.70  | 10.05 | 11.41 | 12.77 | 7.75 |
|                               | 6 <sup>1</sup> A'              | R    | 6.13                               | 7.49  | 8.87  | 10.21 | 11.57 | 12.93 | 8.43 |
|                               | 7 <sup>1</sup> A'              | R    | 6.23                               | 7.55  | 8.87  | 10.22 | 11.57 | 12.94 | 8.69 |
| acetone                       | 1 <sup>1</sup> A <sub>2</sub>  | V    | 3.97                               | 6.18  | 8.31  | 10.39 | 12.53 | 14.99 | 4.43 |
|                               | 1 <sup>1</sup> B <sub>2</sub>  | R    | 4.94                               | 2.99  | 8.11  | 9.55  | 10.93 | 12.29 | 6.36 |
|                               | 2 <sup>1</sup> A <sub>2</sub>  | R    | 5.73                               | 7.06  | 8.42  | 9.70  | 11.04 | 12.38 | 7.36 |
|                               | 2 <sup>1</sup> A <sub>1</sub>  | R    | 5.63                               | 7.02  | 8.36  | 9.69  | 11.03 | 12.38 | 7.41 |
|                               | 2 <sup>1</sup> B <sub>2</sub>  | R    | 5.75                               | 7.06  | 8.40  | 9.73  | 11.07 | 12.42 | 7.49 |
|                               | 3 <sup>1</sup> A <sub>1</sub>  | R    | 5.85                               | 7.19  | 8.50  | 9.82  | 11.16 | 12.50 | 7.80 |
|                               | 3 <sup>1</sup> B <sub>2</sub>  | R    | 5.78                               | 7.09  | 8.41  | 9.78  | 11.17 | 12.55 | 8.09 |
|                               | 1 <sup>1</sup> B <sub>1</sub>  | R    | 5.89                               | 7.18  | 8.49  | 9.81  | 11.14 | 12.48 | 8.17 |
| ethylene                      | 1 <sup>1</sup> B <sub>3u</sub> | R    | 6.39                               | 7.51  | 8.53  | 9.48  | 10.41 | 11.33 | 7.11 |
|                               | 1 <sup>1</sup> B <sub>1u</sub> | V    | 5.63                               | 7.33  | 8.87  | 9.80  | 10.71 | 11.63 | 7.65 |
|                               | 1 <sup>1</sup> B <sub>1g</sub> | R    | 6.80                               | 7.74  | 8.65  | 9.56  | 10.47 | 11.38 | 7.80 |
|                               | 1 <sup>1</sup> B <sub>2g</sub> | R    | 6.78                               | 7.73  | 8.65  | 9.56  | 10.47 | 11.38 | 7.90 |
|                               | 2 <sup>1</sup> A <sub>g</sub>  | R    | 6.92                               | 7.83  | 8.76  | 9.68  | 10.60 | 11.52 | 8.28 |
|                               | 2 <sup>1</sup> B <sub>3u</sub> | R    | 6.86                               | 7.80  | 8.76  | 9.74  | 10.69 | 11.62 | 8.62 |
|                               | 3 <sup>1</sup> B <sub>3u</sub> | R    | 7.08                               | 7.99  | 8.89  | 9.80  | 10.72 | 11.65 | 8.90 |
|                               | 4 <sup>1</sup> B <sub>3u</sub> | R    | 7.30                               | 8.27  | 9.25  | 10.24 | 11.22 | 12.20 | 9.08 |
|                               | 3 <sup>1</sup> B <sub>1g</sub> | R    | 6.97                               | 7.97  | 8.92  | 9.86  | 10.79 | 11.72 | 9.20 |
|                               | 2 <sup>1</sup> B <sub>1u</sub> | R    | 7.09                               | 8.00  | 9.00  | 10.46 | 11.63 | 12.64 | 9.33 |
|                               | 5 <sup>1</sup> B <sub>3u</sub> | R    | 7.81                               | 8.81  | 9.80  | 10.77 | 11.73 | 12.68 | 9.51 |
| isobutene                     | <sup>1</sup> B <sub>1</sub>    | R    | 5.34                               | 6.53  | 7.62  | 8.59  | 9.52  | 10.44 | 6.17 |
|                               | <sup>1</sup> A <sub>1</sub>    | R    | 5.23                               | 6.75  | 7.80  | 8.70  | 9.60  | 10.51 | 6.7  |

|                               |             |   |      |      |      |       |       |       |      |
|-------------------------------|-------------|---|------|------|------|-------|-------|-------|------|
| trans-butadiene               | $1^1B_u$    | V | 3.91 | 5.42 | 6.93 | 8.36  | 9.22  | 10.05 | 5.91 |
|                               | $1^1B_g$    | R | 5.48 | 6.47 | 7.37 | 8.21  | 9.04  | 9.87  | 6.22 |
|                               | $2^1A_u$    | R | 5.74 | 6.65 | 7.48 | 8.29  | 9.10  | 9.93  | 6.66 |
|                               | $2^1B_u$    | R | 5.99 | 6.80 | 7.60 | 8.49  | 9.49  | 10.32 | 7.07 |
|                               | $2^1B_g$    | R | 5.95 | 6.74 | 7.57 | 8.37  | 9.18  | 10.00 | 7.36 |
|                               | $3^1A_g$    | R | 6.18 | 6.95 | 7.74 | 8.54  | 9.36  | 10.18 | 7.62 |
|                               | $3^1B_u$    | R | 6.30 | 7.08 | 7.88 | 8.68  | 9.85  | 10.92 | 8.00 |
| pyridine                      | $1^1B_1$    | V | 3.83 | 6.05 | 8.05 | 10.04 | 12.02 | 13.76 | 4.59 |
|                               | $1^1B_2$    | V | 4.80 | 6.31 | 7.80 | 9.27  | 10.71 | 11.90 | 4.99 |
|                               | $1^1A_2$    | V | 4.19 | 6.42 | 8.44 | 10.45 | 12.38 | 14.09 | 5.43 |
|                               | $1^1A_1$    | V | 5.16 | 6.69 | 8.20 | 9.68  | 11.07 | 12.23 | 6.38 |
| pyrazine                      | $1^1B_{3u}$ | V | 3.25 | 5.23 | 7.22 | 9.21  | 11.15 | 13.16 | 3.83 |
|                               | $1^1B_{2u}$ | V | 4.44 | 5.96 | 7.46 | 8.93  | 10.33 | 11.76 | 4.81 |
|                               | $1^1B_{2g}$ | V | 4.75 | 6.92 | 9.10 | 11.28 | 13.41 | 15.58 | 5.46 |
|                               | $1^1B_{1g}$ | V | 5.52 | 7.72 | 9.93 | 12.15 | 14.35 | 16.28 | 6.10 |
|                               | $1^1B_{1u}$ | V | 5.76 | 7.43 | 9.09 | 10.72 | 12.28 | 13.85 | 6.51 |
| pyridazine                    | $1^1B_1$    | V | 2.79 | 4.84 | 6.90 | 8.97  | 11.03 | 13.00 | 3.60 |
|                               | $1^1A_1$    | V | 4.89 | 6.45 | 8.00 | 9.53  | 11.02 | 12.41 | 5.00 |
|                               | $1^1A_2$    | V | 4.78 | 6.84 | 8.90 | 10.96 | 13.00 | 14.95 | 5.30 |
|                               | $1^1B_1$    | V | 5.34 | 7.44 | 9.53 | 11.61 | 13.66 | 15.41 | 6.00 |
|                               | $1^1B_2$    | V | 5.45 | 7.05 | 8.63 | 10.17 | 11.68 | 12.88 | 6.50 |
| pyrimidine                    | $1^1B_1$    | V | 3.58 | 5.59 | 7.60 | 9.62  | 11.75 | 13.55 | 3.85 |
|                               | $1^1A_2$    | V | 3.92 | 5.95 | 7.99 | 10.03 | 12.05 | 13.74 | 4.62 |
|                               | $1^1B_2$    | V | 5.01 | 6.58 | 8.13 | 9.66  | 11.30 | 12.60 | 5.12 |
|                               | $1^1A_2$    | V | 4.83 | 6.92 | 9.01 | 11.09 | 13.28 | 15.14 | 5.52 |
|                               | $1^1B_1$    | V | 5.17 | 7.28 | 9.39 | 11.50 | 13.58 | 15.33 | 5.90 |
|                               | $1^1A_1$    | V | 5.35 | 6.94 | 8.51 | 10.07 | 11.60 | 12.79 | 6.70 |
| s-tetrazine                   | $1^1B_{3u}$ | V | 1.53 | 3.60 | 5.68 | 7.78  | 9.89  | 12.02 | 2.25 |
|                               | $1^1A_u$    | V | 2.70 | 4.84 | 6.99 | 9.15  | 11.29 | 13.47 | 3.40 |
|                               | $1^1A_u$    | V | 4.35 | 6.44 | 8.53 | 10.63 | 12.73 | 14.84 | 5.00 |
|                               | $1^1B_{3u}$ | V | 5.52 | 7.68 | 9.84 | 12.00 | 14.13 | 16.29 | 6.34 |
| Mean absolute error (total)   |             |   | 1.30 | 1.05 | 1.74 | 3.20  | 4.66  | 6.07  |      |
| Mean absolute error (valence) |             |   | 0.75 | 1.27 | 3.14 | 5.04  | 6.85  | 8.55  |      |
| Mean absolute error (Rydberg) |             |   | 1.73 | 0.89 | 0.67 | 1.80  | 2.98  | 4.15  |      |

### 3. Caricato set – Orbital energy gaps from PBE0KLI- $a_0$

**Table S2.** The orbital energy gaps from PBE0KLI- $a_0$  with various  $a_0$  as an approximation to each excitation energy for the Caricato set. The third column indicates the type of excitations: V and R for valence and Rydberg excitations, respectively. See **Table S1** for the experimental values. Unit: eV

| Molecule          | State                          | Type | PBE0KLI- $a_0$ (Orbital energy gap) |      |       |       |       |       |       |
|-------------------|--------------------------------|------|-------------------------------------|------|-------|-------|-------|-------|-------|
|                   |                                |      | 0.0                                 | 0.2  | 0.4   | 0.5   | 0.6   | 0.8   | 1.0   |
| formaldehyde      | 1 <sup>1</sup> A <sub>2</sub>  | V    | 3.46                                | 3.59 | 3.76  | 3.77  | 3.83  | 3.95  | 4.28  |
|                   | 1 <sup>1</sup> B <sub>2</sub>  | R    | 5.83                                | 6.41 | 6.95  | 7.22  | 7.48  | 7.98  | 8.49  |
|                   | 2 <sup>1</sup> B <sub>2</sub>  | R    | 6.67                                | 7.23 | 7.76  | 8.00  | 8.24  | 8.69  | 9.17  |
|                   | 2 <sup>1</sup> A <sub>1</sub>  | R    | 6.61                                | 7.28 | 7.90  | 8.22  | 8.52  | 9.10  | 9.75  |
|                   | 2 <sup>1</sup> A <sub>2</sub>  | R    | 6.92                                | 7.53 | 8.12  | 8.42  | 8.70  | 9.27  | 10.00 |
|                   | 3 <sup>1</sup> B <sub>2</sub>  | R    | 7.46                                | 8.13 | 8.74  | 9.05  | 9.34  | 9.88  | 10.55 |
|                   | 1 <sup>1</sup> B <sub>1</sub>  | V    | 8.07                                | 8.24 | 8.47  | 8.48  | 8.56  | 8.71  | 9.00  |
|                   | 3 <sup>1</sup> A <sub>2</sub>  | R    | 7.73                                | 8.44 | 9.14  | 9.50  | 9.84  | 10.54 | 11.52 |
|                   | 4 <sup>1</sup> B <sub>2</sub>  | R    | 7.66                                | 8.36 | 9.04  | 9.39  | 9.73  | 10.39 | 11.27 |
|                   | 4 <sup>1</sup> A <sub>1</sub>  | R    | 8.23                                | 8.94 | 9.64  | 10.02 | 10.38 | 11.10 | 12.20 |
|                   | 5 <sup>1</sup> B <sub>2</sub>  | R    | 7.71                                | 8.46 | 9.20  | 9.59  | 9.97  | 10.73 | 11.86 |
| acetaldehyde      | 1 <sup>1</sup> A''             | V    | 3.84                                | 3.99 | 4.14  | 4.21  | 4.28  | 4.42  | 4.75  |
|                   | 2 <sup>1</sup> A'              | R    | 5.38                                | 5.92 | 6.42  | 6.66  | 6.90  | 7.34  | 7.78  |
|                   | 3 <sup>1</sup> A'              | R    | 5.94                                | 6.55 | 7.12  | 7.39  | 7.66  | 8.16  | 8.66  |
|                   | 4 <sup>1</sup> A'              | R    | 6.33                                | 6.96 | 7.55  | 7.82  | 8.09  | 8.60  | 9.10  |
|                   | 6 <sup>1</sup> A'              | R    | 6.90                                | 7.56 | 8.19  | 8.50  | 8.79  | 9.35  | 9.98  |
| 7 <sup>1</sup> A' | R                              | 7.07 | 7.78                                | 8.47 | 8.80  | 9.13  | 9.76  | 10.51 |       |
| acetone           | 1 <sup>1</sup> A <sub>2</sub>  | V    | 3.93                                | 4.11 | 4.32  | 4.35  | 4.44  | 4.59  | 4.91  |
|                   | 1 <sup>1</sup> B <sub>2</sub>  | R    | 4.96                                | 5.49 | 5.97  | 6.21  | 6.44  | 6.87  | 7.27  |
|                   | 2 <sup>1</sup> A <sub>2</sub>  | R    | 5.93                                | 6.56 | 7.14  | 7.44  | 7.72  | 8.24  | 8.77  |
|                   | 2 <sup>1</sup> A <sub>1</sub>  | R    | 5.72                                | 6.37 | 6.96  | 7.26  | 7.53  | 8.06  | 8.57  |
|                   | 2 <sup>1</sup> B <sub>2</sub>  | R    | 6.04                                | 6.69 | 7.31  | 7.62  | 7.91  | 8.50  | 9.09  |
|                   | 3 <sup>1</sup> A <sub>1</sub>  | R    | 6.53                                | 7.22 | 7.85  | 8.16  | 8.46  | 9.00  | 9.55  |
|                   | 3 <sup>1</sup> B <sub>2</sub>  | R    | 6.28                                | 6.90 | 7.45  | 7.74  | 7.99  | 8.41  | 8.86  |
|                   | 1 <sup>1</sup> B <sub>1</sub>  | R    | 6.58                                | 7.29 | 7.96  | 8.29  | 8.60  | 9.18  | 9.74  |
| ethylene          | 1 <sup>1</sup> B <sub>3u</sub> | R    | 6.46                                | 6.85 | 7.21  | 7.40  | 7.58  | 7.91  | 8.04  |
|                   | 1 <sup>1</sup> B <sub>1u</sub> | V    | 5.65                                | 5.73 | 5.79  | 5.84  | 5.88  | 5.95  | 5.98  |
|                   | 1 <sup>1</sup> B <sub>1g</sub> | R    | 7.01                                | 7.47 | 7.89  | 8.12  | 8.32  | 8.70  | 8.91  |
|                   | 1 <sup>1</sup> B <sub>2g</sub> | R    | 6.95                                | 7.43 | 7.86  | 8.09  | 8.31  | 8.72  | 8.95  |
|                   | 2 <sup>1</sup> A <sub>g</sub>  | R    | 7.33                                | 7.73 | 8.10  | 8.31  | 8.49  | 8.86  | 9.14  |
|                   | 2 <sup>1</sup> B <sub>3u</sub> | R    | 7.79                                | 8.28 | 8.68  | 8.89  | 9.07  | 9.39  | 9.59  |
|                   | 3 <sup>1</sup> B <sub>3u</sub> | R    | 7.99                                | 8.42 | 8.86  | 9.12  | 9.36  | 9.82  | 10.23 |
|                   | 4 <sup>1</sup> B <sub>3u</sub> | R    | 8.26                                | 8.75 | 9.23  | 9.50  | 9.74  | 10.23 | 10.78 |
|                   | 3 <sup>1</sup> B <sub>1g</sub> | R    | 8.55                                | 9.01 | 9.44  | 9.67  | 9.88  | 10.28 | 10.70 |
|                   | 2 <sup>1</sup> B <sub>1u</sub> | R    | 8.12                                | 8.60 | 9.06  | 9.31  | 9.55  | 10.01 | 10.54 |
|                   | 5 <sup>1</sup> B <sub>3u</sub> | R    | 9.30                                | 9.74 | 10.12 | 10.34 | 10.53 | 10.91 | 11.37 |
| isobutene         | <sup>1</sup> B <sub>1</sub>    | R    | 5.37                                | 5.74 | 6.08  | 6.24  | 6.40  | 6.70  | 6.84  |
|                   | <sup>1</sup> A <sub>1</sub>    | R    | 5.23                                | 5.34 | 5.43  | 5.47  | 5.51  | 5.58  | 5.65  |
|                   | 1 <sup>1</sup> B <sub>u</sub>  | V    | 3.93                                | 3.98 | 4.02  | 4.06  | 4.09  | 4.14  | 4.18  |

|                               |             |   |      |      |      |      |      |      |      |
|-------------------------------|-------------|---|------|------|------|------|------|------|------|
| trans-butadiene               | $1^1B_g$    | R | 5.55 | 5.93 | 6.26 | 6.45 | 6.62 | 6.93 | 7.03 |
|                               | $2^1A_u$    | R | 5.84 | 6.24 | 6.60 | 6.78 | 7.00 | 7.34 | 7.49 |
|                               | $2^1B_u$    | R | 6.35 | 6.71 | 7.04 | 7.23 | 7.40 | 7.74 | 7.96 |
|                               | $2^1B_g$    | R | 6.53 | 6.99 | 7.40 | 7.63 | 7.84 | 8.21 | 8.36 |
|                               | $3^1A_g$    | R | 6.86 | 7.23 | 7.58 | 7.78 | 7.96 | 8.32 | 9.29 |
|                               | $3^1B_u$    | R | 7.52 | 7.96 | 8.36 | 8.59 | 8.80 | 9.21 | 9.62 |
| pyridine                      | $1^1B_1$    | V | 3.99 | 4.08 | 4.18 | 4.22 | 4.27 | 4.35 | 4.62 |
|                               | $1^1B_2$    | V | 4.82 | 4.83 | 4.83 | 4.85 | 4.86 | 4.87 | 4.85 |
|                               | $1^1A_2$    | V | 4.36 | 4.48 | 4.58 | 4.65 | 4.71 | 4.81 | 5.11 |
|                               | $1^1A_1$    | V | 5.19 | 5.23 | 5.23 | 5.28 | 5.30 | 5.33 | 5.34 |
| pyrazine                      | $1^1B_{3u}$ | V | 3.19 | 3.25 | 3.32 | 3.33 | 3.36 | 3.41 | 3.66 |
|                               | $1^1B_{2u}$ | V | 4.46 | 4.45 | 4.43 | 4.44 | 4.43 | 4.42 | 4.38 |
|                               | $1^1B_{2g}$ | V | 4.67 | 4.76 | 4.89 | 4.89 | 4.93 | 5.01 | 5.22 |
|                               | $1^1B_{1g}$ | V | 5.45 | 5.59 | 5.74 | 5.79 | 5.85 | 5.98 | 6.25 |
|                               | $1^1B_{1u}$ | V | 5.71 | 5.75 | 5.82 | 5.81 | 5.83 | 5.87 | 5.86 |
| pyridazine                    | $1^1B_1$    | V | 2.69 | 2.80 | 2.87 | 2.94 | 2.99 | 3.08 | 3.37 |
|                               | $1^1A_1$    | V | 4.87 | 4.89 | 4.90 | 4.91 | 4.91 | 4.93 | 4.91 |
|                               | $1^1A_2$    | V | 4.68 | 4.76 | 4.88 | 4.88 | 4.92 | 4.98 | 5.22 |
|                               | $1^1B_1$    | V | 5.27 | 5.38 | 5.49 | 5.53 | 5.58 | 5.67 | 5.94 |
|                               | $1^1B_2$    | V | 5.46 | 5.50 | 5.52 | 5.56 | 5.58 | 5.61 | 5.63 |
| pyrimidine                    | $1^1B_1$    | V | 3.48 | 3.58 | 3.67 | 3.72 | 3.76 | 3.85 | 4.13 |
|                               | $1^1A_2$    | V | 3.84 | 3.96 | 4.06 | 4.13 | 4.18 | 4.29 | 4.60 |
|                               | $1^1B_2$    | V | 5.00 | 5.02 | 5.03 | 5.04 | 5.05 | 5.07 | 5.07 |
|                               | $1^1A_2$    | V | 4.73 | 4.82 | 4.91 | 4.95 | 5.00 | 5.08 | 5.34 |
|                               | $1^1B_1$    | V | 5.08 | 5.20 | 5.30 | 5.36 | 5.42 | 5.52 | 5.80 |
|                               | $1^1A_1$    | V | 5.36 | 5.40 | 5.42 | 5.45 | 5.47 | 5.51 | 5.53 |
| s-tetrazine                   | $1^1B_{3u}$ | V | 1.42 | 1.49 | 1.55 | 1.58 | 1.61 | 1.67 | 1.94 |
|                               | $1^1A_u$    | V | 2.64 | 2.76 | 2.83 | 2.93 | 2.98 | 3.09 | 3.43 |
|                               | $1^1A_u$    | V | 4.25 | 4.29 | 4.38 | 4.34 | 4.36 | 4.39 | 4.59 |
|                               | $1^1B_{3u}$ | V | 5.47 | 5.56 | 5.65 | 5.69 | 5.73 | 5.81 | 6.08 |
| Mean absolute error (total)   |             |   | 1.01 | 0.67 | 0.40 | 0.38 | 0.48 | 0.72 | 0.95 |
| Mean absolute error (valence) |             |   | 0.78 | 0.70 | 0.62 | 0.58 | 0.54 | 0.49 | 0.40 |
| Mean absolute error (Rydberg) |             |   | 1.18 | 0.65 | 0.23 | 0.23 | 0.43 | 0.89 | 1.38 |

#### 4. Caricato set – TDDFT results from PBE0HF- $a_0$

**Table S3.** The excitation energies of the Caricato set from TDDFT calculations performed on PBE0HF- $a_0$  orbitals with various  $a_0$ . The third column indicates the type of excitations: V and R for valence and Rydberg excitations, respectively. See **Table S1** for the experimental values. Unit: eV

| Molecule     | State                          | Type | PBE0HF- $a_0$ (TDDFT) |      |      |      |       |       |
|--------------|--------------------------------|------|-----------------------|------|------|------|-------|-------|
|              |                                |      | 0.0                   | 0.2  | 0.4  | 0.6  | 0.8   | 1.0   |
| formaldehyde | 1 <sup>1</sup> A <sub>2</sub>  | V    | 3.78                  | 3.88 | 3.98 | 4.10 | 4.22  | 4.37  |
|              | 1 <sup>1</sup> B <sub>2</sub>  | R    | 5.76                  | 6.51 | 7.25 | 7.98 | 8.68  | 9.35  |
|              | 2 <sup>1</sup> B <sub>2</sub>  | R    | 6.36                  | 7.24 | 7.99 | 8.72 | 9.41  | 10.08 |
|              | 2 <sup>1</sup> A <sub>1</sub>  | R    | 6.33                  | 7.22 | 8.04 | 8.83 | 9.44  | 9.44  |
|              | 2 <sup>1</sup> A <sub>2</sub>  | R    | 6.42                  | 7.35 | 8.22 | 9.04 | 9.83  | 10.61 |
|              | 3 <sup>1</sup> B <sub>2</sub>  | R    | 6.40                  | 7.41 | 8.45 | 9.46 | 10.42 | 11.30 |
|              | 1 <sup>1</sup> B <sub>1</sub>  | V    | 8.83                  | 9.01 | 9.17 | 9.33 | 9.48  | 9.62  |
|              | 3 <sup>1</sup> A <sub>2</sub>  | R    | 6.86                  | 7.75 | 8.72 | 9.74 | 10.81 | 11.24 |
|              | 4 <sup>1</sup> B <sub>2</sub>  | R    | 6.71                  | 7.64 | 8.64 | 9.64 | 10.59 | 11.49 |
|              | 4 <sup>1</sup> A <sub>1</sub>  | R    | 6.81                  | 7.78 | 8.75 | 9.68 | 10.64 | 11.56 |
|              | 5 <sup>1</sup> B <sub>2</sub>  | R    | 6.76                  | 7.75 | 8.78 | 9.75 | 10.67 | 11.57 |
| acetaldehyde | 1 <sup>1</sup> A''             | V    | 4.11                  | 4.22 | 4.33 | 4.46 | 4.60  | 4.75  |
|              | 2 <sup>1</sup> A'              | R    | 5.43                  | 6.25 | 7.04 | 7.80 | 8.53  | 9.22  |
|              | 3 <sup>1</sup> A'              | R    | 5.88                  | 6.73 | 7.58 | 8.41 | 9.19  | 9.44  |
|              | 4 <sup>1</sup> A'              | R    | 6.05                  | 6.96 | 7.79 | 8.59 | 9.27  | 9.99  |
|              | 6 <sup>1</sup> A'              | R    | 6.12                  | 7.18 | 8.23 | 9.15 | 10.04 | 10.89 |
|              | 7 <sup>1</sup> A'              | R    | 6.22                  | 7.23 | 8.26 | 9.23 | 10.11 | 10.97 |
| acetone      | 1 <sup>1</sup> A <sub>2</sub>  | V    | 4.20                  | 4.35 | 4.50 | 4.66 | 4.82  | 5.00  |
|              | 1 <sup>1</sup> B <sub>2</sub>  | R    | 4.94                  | 5.83 | 6.68 | 7.51 | 8.30  | 9.05  |
|              | 2 <sup>1</sup> A <sub>2</sub>  | R    | 5.72                  | 6.63 | 7.50 | 8.35 | 9.17  | 9.95  |
|              | 2 <sup>1</sup> A <sub>1</sub>  | R    | 5.65                  | 6.57 | 7.48 | 8.36 | 9.15  | 9.43  |
|              | 2 <sup>1</sup> B <sub>2</sub>  | R    | 5.75                  | 6.68 | 7.55 | 8.40 | 9.23  | 10.05 |
|              | 3 <sup>1</sup> A <sub>1</sub>  | R    | 5.86                  | 6.92 | 7.96 | 8.91 | 9.50  | 10.18 |
|              | 3 <sup>1</sup> B <sub>2</sub>  | R    | 5.78                  | 6.79 | 7.79 | 8.73 | 9.61  | 10.46 |
|              | 1 <sup>1</sup> B <sub>1</sub>  | R    | 5.89                  | 6.94 | 7.98 | 8.96 | 9.53  | 9.74  |
| ethylene     | 1 <sup>1</sup> B <sub>3u</sub> | R    | 6.38                  | 6.72 | 7.04 | 7.35 | 7.65  | 7.93  |
|              | 1 <sup>1</sup> B <sub>1u</sub> | V    | 7.07                  | 7.43 | 7.53 | 7.57 | 7.60  | 7.60  |
|              | 1 <sup>1</sup> B <sub>1g</sub> | R    | 6.79                  | 7.23 | 7.59 | 7.93 | 8.26  | 8.56  |
|              | 1 <sup>1</sup> B <sub>2g</sub> | R    | 6.77                  | 7.22 | 7.63 | 8.02 | 8.39  | 8.76  |
|              | 2 <sup>1</sup> A <sub>g</sub>  | R    | 6.92                  | 7.42 | 7.87 | 8.28 | 8.65  | 9.00  |
|              | 2 <sup>1</sup> B <sub>3u</sub> | R    | 6.86                  | 7.50 | 8.10 | 8.64 | 9.10  | 9.50  |
|              | 3 <sup>1</sup> B <sub>3u</sub> | R    | 7.08                  | 7.68 | 8.26 | 8.80 | 9.32  | 9.76  |
|              | 4 <sup>1</sup> B <sub>3u</sub> | R    | 7.29                  | 7.85 | 8.40 | 8.93 | 9.40  | 9.86  |
|              | 3 <sup>1</sup> B <sub>1g</sub> | R    | 7.41                  | 7.96 | 8.30 | 8.84 | 9.42  | 9.96  |
|              | 2 <sup>1</sup> B <sub>1u</sub> | R    | 7.33                  | 7.73 | 8.32 | 8.89 | 9.43  | 9.92  |
|              | 5 <sup>1</sup> B <sub>3u</sub> | R    | 7.78                  | 8.23 | 8.71 | 9.21 | 9.75  | 10.33 |
| isobutene    | <sup>1</sup> B <sub>1</sub>    | R    | 5.33                  | 5.79 | 6.22 | 6.63 | 7.01  | 7.37  |
|              | <sup>1</sup> A <sub>1</sub>    | R    | 5.90                  | 6.33 | 6.68 | 6.95 | 7.14  | 7.26  |
|              | 1 <sup>1</sup> B <sub>u</sub>  | V    | 5.41                  | 5.60 | 5.77 | 5.90 | 6.00  | 6.07  |

|                               |             |   |      |      |      |      |      |      |
|-------------------------------|-------------|---|------|------|------|------|------|------|
| trans-butadiene               | $1^1B_g$    | R | 5.46 | 5.79 | 6.10 | 6.41 | 6.71 | 7.00 |
|                               | $2^1A_u$    | R | 5.73 | 6.11 | 6.37 | 6.82 | 7.17 | 7.50 |
|                               | $2^1B_u$    | R | 6.03 | 6.44 | 6.82 | 7.17 | 7.49 | 7.81 |
|                               | $2^1B_g$    | R | 5.95 | 6.47 | 6.97 | 7.40 | 7.79 | 8.16 |
|                               | $3^1A_g$    | R | 6.17 | 6.65 | 7.12 | 7.57 | 8.00 | 8.40 |
|                               | $3^1B_u$    | R | 6.31 | 6.79 | 7.28 | 7.76 | 8.25 | 8.74 |
| pyridine                      | $1^1B_1$    | V | 4.34 | 4.76 | 5.11 | 5.42 | 5.70 | 5.97 |
|                               | $1^1B_2$    | V | 5.31 | 5.49 | 5.64 | 5.76 | 5.86 | 5.94 |
|                               | $1^1A_2$    | V | 4.44 | 5.06 | 5.67 | 6.25 | 6.79 | 7.31 |
|                               | $1^1A_1$    | V | 6.17 | 6.28 | 6.38 | 6.39 | 6.34 | 6.25 |
| pyrazine                      | $1^1B_{3u}$ | V | 3.54 | 3.91 | 4.21 | 4.47 | 4.70 | 4.90 |
|                               | $1^1B_{2u}$ | V | 5.21 | 5.35 | 5.46 | 5.54 | 5.59 | 5.62 |
|                               | $1^1B_{2g}$ | V | 5.11 | 5.58 | 5.92 | 6.18 | 6.39 | 6.57 |
|                               | $1^1B_{1g}$ | V | 5.57 | 6.40 | 7.23 | 8.07 | 8.92 | 9.76 |
|                               | $1^1B_{1u}$ | V | 6.37 | 6.50 | 6.57 | 6.56 | 6.49 | 6.37 |
| pyridazine                    | $1^1B_1$    | V | 3.11 | 3.53 | 3.89 | 4.19 | 4.45 | 4.67 |
|                               | $1^1A_1$    | V | 5.44 | 5.62 | 5.78 | 5.90 | 6.00 | 6.07 |
|                               | $1^1A_2$    | V | 5.01 | 5.45 | 5.86 | 6.26 | 6.68 | 7.12 |
|                               | $1^1B_1$    | V | 5.43 | 6.07 | 6.66 | 7.24 | 7.79 | 8.33 |
|                               | $1^1B_2$    | V | 6.30 | 6.36 | 6.51 | 6.51 | 6.43 | 6.29 |
| pyrimidine                    | $1^1B_1$    | V | 3.77 | 4.22 | 4.63 | 5.01 | 5.36 | 5.70 |
|                               | $1^1A_2$    | V | 3.99 | 4.56 | 5.08 | 5.57 | 6.00 | 6.41 |
|                               | $1^1B_2$    | V | 5.57 | 5.75 | 5.91 | 6.05 | 6.17 | 6.27 |
|                               | $1^1A_2$    | V | 5.08 | 5.64 | 6.12 | 6.55 | 6.96 | 7.35 |
|                               | $1^1B_1$    | V | 5.31 | 5.94 | 6.53 | 7.10 | 7.65 | 8.17 |
|                               | $1^1A_1$    | V | 6.41 | 6.58 | 6.68 | 6.71 | 6.70 | 6.65 |
| s-tetrazine                   | $1^1B_{3u}$ | V | 1.82 | 2.19 | 2.51 | 2.78 | 3.01 | 3.22 |
|                               | $1^1A_u$    | V | 2.80 | 3.43 | 4.03 | 4.58 | 5.07 | 5.48 |
|                               | $1^1A_u$    | V | 4.61 | 5.07 | 5.45 | 5.80 | 6.12 | 6.44 |
|                               | $1^1B_{3u}$ | V | 5.63 | 6.28 | 6.90 | 7.49 | 8.05 | 8.60 |
| Mean absolute error (total)   |             |   | 1.13 | 0.63 | 0.38 | 0.56 | 0.98 | 1.39 |
| Mean absolute error (valence) |             |   | 0.40 | 0.19 | 0.41 | 0.67 | 0.93 | 1.19 |
| Mean absolute error (Rydberg) |             |   | 1.70 | 0.98 | 0.35 | 0.48 | 1.01 | 1.55 |



**Table S4.** The excitation energies of the Caricato set from TDDFT calculations performed on PBE0HF- $a_0$  orbitals with various  $a_0$ . An LDA kernel was used. The third column indicates the type of excitations: V and R for valence and Rydberg excitations, respectively. See **Table S12** for the experimental values. Unit: eV

| Molecule        | State                          | Type | PBE0HF- $a_0$ (TDDFT w/ LDA ker.) |       |       |       |       |       |
|-----------------|--------------------------------|------|-----------------------------------|-------|-------|-------|-------|-------|
|                 |                                |      | 0.0                               | 0.2   | 0.4   | 0.6   | 0.8   | 1.0   |
| formaldehyde    | 1 <sup>1</sup> A <sub>2</sub>  | V    | 3.64                              | 5.93  | 8.18  | 10.32 | 11.83 | 13.24 |
|                 | 1 <sup>1</sup> B <sub>2</sub>  | R    | 5.64                              | 7.23  | 8.76  | 10.22 | 11.64 | 13.05 |
|                 | 2 <sup>1</sup> B <sub>2</sub>  | R    | 6.35                              | 7.68  | 9.04  | 10.44 | 11.85 | 13.26 |
|                 | 2 <sup>1</sup> A <sub>1</sub>  | R    | 6.30                              | 7.66  | 9.01  | 10.38 | 11.76 | 13.15 |
|                 | 2 <sup>1</sup> A <sub>2</sub>  | R    | 6.42                              | 7.75  | 9.10  | 10.51 | 12.32 | 13.83 |
|                 | 3 <sup>1</sup> B <sub>2</sub>  | R    | 6.38                              | 7.75  | 9.11  | 10.49 | 11.89 | 13.31 |
|                 | 1 <sup>1</sup> B <sub>1</sub>  | V    | 8.64                              | 11.12 | 13.56 | 15.79 | 17.92 | 20.96 |
|                 | 3 <sup>1</sup> A <sub>2</sub>  | R    | 6.85                              | 8.24  | 9.64  | 11.05 | 12.50 | 14.04 |
|                 | 4 <sup>1</sup> B <sub>2</sub>  | R    | 6.67                              | 8.07  | 9.47  | 10.89 | 12.34 | 13.79 |
|                 | 4 <sup>1</sup> A <sub>1</sub>  | R    | 6.78                              | 8.14  | 9.53  | 10.93 | 12.34 | 13.76 |
|                 | 5 <sup>1</sup> B <sub>2</sub>  | R    | 6.73                              | 8.14  | 9.59  | 11.00 | 12.40 | 13.81 |
| acetaldehyde    | 1 <sup>1</sup> A''             | V    | 3.99                              | 6.24  | 8.48  | 10.60 | 12.51 | 15.21 |
|                 | 2 <sup>1</sup> A'              | R    | 5.36                              | 6.93  | 8.43  | 9.86  | 11.24 | 12.63 |
|                 | 3 <sup>1</sup> A'              | R    | 5.80                              | 7.27  | 8.64  | 9.99  | 11.35 | 12.71 |
|                 | 4 <sup>1</sup> A'              | R    | 6.04                              | 7.35  | 8.70  | 10.05 | 11.41 | 12.77 |
|                 | 6 <sup>1</sup> A'              | R    | 6.11                              | 7.45  | 8.84  | 10.21 | 11.56 | 12.93 |
|                 | 7 <sup>1</sup> A'              | R    | 6.21                              | 7.54  | 8.87  | 10.21 | 11.57 | 12.93 |
| acetone         | 1 <sup>1</sup> A <sub>2</sub>  | V    | 4.09                              | 6.30  | 8.34  | 10.41 | 12.53 | 15.06 |
|                 | 1 <sup>1</sup> B <sub>2</sub>  | R    | 4.90                              | 6.53  | 8.08  | 9.54  | 10.93 | 12.29 |
|                 | 2 <sup>1</sup> A <sub>2</sub>  | R    | 5.71                              | 7.06  | 8.47  | 9.70  | 11.04 | 12.38 |
|                 | 2 <sup>1</sup> A <sub>1</sub>  | R    | 5.62                              | 7.02  | 8.36  | 9.69  | 11.03 | 12.37 |
|                 | 2 <sup>1</sup> B <sub>2</sub>  | R    | 5.74                              | 7.05  | 8.39  | 9.73  | 11.07 | 12.41 |
|                 | 3 <sup>1</sup> A <sub>1</sub>  | R    | 5.85                              | 7.19  | 8.50  | 9.82  | 11.15 | 12.50 |
|                 | 3 <sup>1</sup> B <sub>2</sub>  | R    | 5.77                              | 7.08  | 8.40  | 9.77  | 11.16 | 12.55 |
|                 | 1 <sup>1</sup> B <sub>1</sub>  | R    | 5.89                              | 7.17  | 8.48  | 9.81  | 11.14 | 12.48 |
| ethylene        | 1 <sup>1</sup> B <sub>3u</sub> | R    | 6.28                              | 7.43  | 8.48  | 9.46  | 10.39 | 11.32 |
|                 | 1 <sup>1</sup> B <sub>1u</sub> | V    | 7.00                              | 7.98  | 8.89  | 9.80  | 10.71 | 11.62 |
|                 | 1 <sup>1</sup> B <sub>1g</sub> | R    | 6.77                              | 7.73  | 8.65  | 9.56  | 10.47 | 11.38 |
|                 | 1 <sup>1</sup> B <sub>2g</sub> | R    | 6.94                              | 7.94  | 8.90  | 9.85  | 10.78 | 11.71 |
|                 | 2 <sup>1</sup> A <sub>g</sub>  | R    | 11.50                             | 7.83  | 8.75  | 9.67  | 10.59 | 11.50 |
|                 | 2 <sup>1</sup> B <sub>3u</sub> | R    | 6.86                              | 7.78  | 8.73  | 9.70  | 10.66 | 11.61 |
|                 | 3 <sup>1</sup> B <sub>3u</sub> | R    | 7.08                              | 7.99  | 8.89  | 9.80  | 10.71 | 11.63 |
|                 | 4 <sup>1</sup> B <sub>3u</sub> | R    | 7.28                              | 8.25  | 9.23  | 10.21 | 11.20 | 12.17 |
|                 | 3 <sup>1</sup> B <sub>1g</sub> | R    | 7.39                              | 8.39  | 9.39  | 10.38 | 11.35 | 12.30 |
|                 | 2 <sup>1</sup> B <sub>1u</sub> | R    | 7.15                              | 8.48  | 9.63  | 10.66 | 11.64 | 12.61 |
|                 | 5 <sup>1</sup> B <sub>3u</sub> | R    | 7.75                              | 8.77  | 9.76  | 10.73 | 11.70 | 12.66 |
| isobutene       | <sup>1</sup> B <sub>1</sub>    | R    | 5.27                              | 6.47  | 7.58  | 8.57  | 9.51  | 10.44 |
|                 | <sup>1</sup> A <sub>1</sub>    | R    | 5.83                              | 6.87  | 7.79  | 8.69  | 9.60  | 10.51 |
| trans-butadiene | 1 <sup>1</sup> B <sub>u</sub>  | V    | 5.25                              | 6.59  | 8.68  | 10.02 | 9.97  | 12.77 |
|                 | 1 <sup>1</sup> B <sub>g</sub>  | R    | 5.40                              | 6.41  | 7.34  | 8.20  | 9.03  | 9.86  |

|                               |            |   |      |      |      |       |       |       |
|-------------------------------|------------|---|------|------|------|-------|-------|-------|
|                               | $2^1A_u$   | R | 5.69 | 6.63 | 7.48 | 8.29  | 9.10  | 9.92  |
|                               | $2^1B_u$   | R | 6.02 | 6.88 | 7.56 | 8.39  | 9.21  | 10.04 |
|                               | $2^1B_g$   | R | 5.94 | 6.73 | 7.55 | 8.37  | 9.18  | 10.00 |
|                               | $3^1A_g$   | R | 6.21 | 7.42 | 7.74 | 8.54  | 9.35  | 10.18 |
|                               | $3^1B_u$   | R | 6.30 | 7.09 | 7.85 | 8.67  | 9.49  | 10.31 |
| pyridine                      | $^1B_1$    | V | 4.25 | 6.24 | 8.23 | 10.20 | 12.16 | 13.77 |
|                               | $^1B_2$    | V | 5.24 | 6.79 | 8.29 | 9.80  | 11.05 | 11.90 |
|                               | $^1A_2$    | V | 4.41 | 6.42 | 8.44 | 10.45 | 12.38 | 14.08 |
|                               | $^1A_1$    | V | 5.99 | 7.53 | 9.02 | 10.41 | 11.08 | 12.88 |
| pyrazine                      | $^1B_{3u}$ | V | 3.45 | 5.43 | 7.41 | 9.40  | 11.16 | 13.35 |
|                               | $^1B_{2u}$ | V | 5.13 | 6.70 | 8.22 | 9.71  | 10.34 | 12.22 |
|                               | $^1B_{2g}$ | V | 5.01 | 7.17 | 9.35 | 11.52 | 13.43 | 15.85 |
|                               | $^1B_{1g}$ | V | 5.55 | 7.75 | 9.98 | 12.16 | 14.36 | 16.36 |
|                               | $^1B_{1u}$ | V | 6.19 | 7.75 | 9.30 | 10.74 | 11.78 | 13.82 |
| pyridazine                    | $^1B_1$    | V | 3.03 | 5.07 | 7.12 | 9.18  | 11.06 | 13.01 |
|                               | $^1A_1$    | V | 5.38 | 6.97 | 8.55 | 10.09 | 11.05 | 12.42 |
|                               | $^1A_2$    | V | 4.92 | 6.98 | 9.03 | 11.08 | 13.03 | 15.15 |
|                               | $^1B_1$    | V | 5.39 | 7.48 | 9.57 | 11.65 | 13.70 | 15.94 |
|                               | $^1B_2$    | V | 6.11 | 7.73 | 9.29 | 10.81 | 11.59 | 13.00 |
| pyrimidine                    | $^1B_1$    | V | 3.70 | 5.71 | 7.72 | 9.73  | 11.72 | 13.61 |
|                               | $^1A_2$    | V | 3.95 | 5.98 | 8.02 | 10.05 | 12.08 | 13.89 |
|                               | $^1B_2$    | V | 5.50 | 7.11 | 8.69 | 10.25 | 11.72 | 12.78 |
|                               | $^1A_2$    | V | 5.01 | 7.09 | 9.17 | 11.24 | 13.29 | 15.21 |
|                               | $^1B_1$    | V | 5.26 | 7.37 | 9.47 | 11.57 | 13.64 | 15.48 |
|                               | $^1A_1$    | V | 6.23 | 7.82 | 9.40 | 10.90 | 12.23 | 13.99 |
| s-tetrazine                   | $^1B_{3u}$ | V | 1.74 | 3.81 | 5.89 | 7.99  | 10.10 | 12.22 |
|                               | $^1A_u$    | V | 2.76 | 4.90 | 7.05 | 9.20  | 11.33 | 13.24 |
|                               | $^1A_u$    | V | 4.53 | 6.61 | 8.70 | 10.79 | 12.89 | 13.51 |
|                               | $^1B_{3u}$ | V | 5.58 | 7.74 | 9.90 | 12.06 | 14.17 | 16.34 |
| Mean absolute error (total)   |            |   | 1.21 | 1.00 | 1.87 | 3.33  | 4.70  | 6.17  |
| Mean absolute error (valence) |            |   | 0.47 | 1.53 | 3.45 | 5.31  | 6.95  | 8.81  |
| Mean absolute error (Rydberg) |            |   | 1.77 | 0.59 | 0.66 | 1.81  | 2.98  | 4.14  |

## 5. Caricato set – TDDFT results from PBE0KLI- $a_0$

**Table S5.** The excitation energies of the Caricato set from TDDFT calculations performed on PBE0KLI- $a_0$  orbitals with various  $a_0$ . An LDA kernel was used. The third column indicates the type of excitations: V and R for valence and Rydberg excitations, respectively. See **Table S12** for the experimental values. Unit: eV

| Molecule                      | State                          | Type | PBE0KLI- $a_0$ (TDDFT w/ LDA ker.) |      |       |       |       |       |       |
|-------------------------------|--------------------------------|------|------------------------------------|------|-------|-------|-------|-------|-------|
|                               |                                |      | 0.0                                | 0.2  | 0.4   | 0.5   | 0.6   | 0.8   | 1.0   |
| formaldehyde                  | 1 <sup>1</sup> A <sub>2</sub>  | V    | 3.78                               | 3.91 | 4.07  | 4.09  | 4.15  | 4.26  | 4.59  |
|                               | 1 <sup>1</sup> B <sub>2</sub>  | R    | 5.81                               | 6.40 | 6.95  | 7.23  | 7.50  | 8.01  | 8.54  |
|                               | 2 <sup>1</sup> B <sub>2</sub>  | R    | 6.66                               | 7.25 | 7.79  | 8.05  | 8.31  | 8.78  | 9.31  |
|                               | 2 <sup>1</sup> A <sub>1</sub>  | R    | 6.59                               | 7.27 | 7.90  | 8.23  | 8.54  | 9.13  | 9.81  |
|                               | 2 <sup>1</sup> A <sub>2</sub>  | R    | 6.88                               | 7.50 | 8.08  | 8.38  | 8.67  | 9.23  | 9.96  |
|                               | 3 <sup>1</sup> B <sub>2</sub>  | R    | 7.48                               | 8.17 | 8.80  | 9.12  | 9.42  | 9.99  | 10.68 |
|                               | 1 <sup>1</sup> B <sub>1</sub>  | V    | 8.76                               | 8.92 | 8.96  | 9.14  | 9.22  | 9.36  | 9.63  |
|                               | 3 <sup>1</sup> A <sub>2</sub>  | R    | 7.70                               | 8.41 | 9.11  | 9.47  | 9.81  | 9.89  | 10.13 |
|                               | 4 <sup>1</sup> B <sub>2</sub>  | R    | 7.63                               | 8.33 | 9.01  | 9.36  | 9.70  | 10.36 | 11.24 |
|                               | 4 <sup>1</sup> A <sub>1</sub>  | R    | 8.27                               | 8.98 | 9.68  | 10.03 | 10.36 | 10.92 | 11.78 |
|                               | 5 <sup>1</sup> B <sub>2</sub>  | R    | 7.72                               | 8.45 | 9.20  | 9.59  | 9.97  | 10.72 | 11.85 |
| acetaldehyde                  | 1 <sup>1</sup> A''             | V    | 4.14                               | 4.29 | 4.44  | 4.51  | 4.58  | 4.72  | 5.04  |
|                               | 2 <sup>1</sup> A'              | R    | 5.46                               | 6.00 | 6.50  | 6.74  | 6.97  | 7.42  | 7.86  |
|                               | 3 <sup>1</sup> A'              | R    | 5.94                               | 6.56 | 7.15  | 7.43  | 7.71  | 8.23  | 8.76  |
|                               | 4 <sup>1</sup> A'              | R    | 6.31                               | 6.95 | 7.55  | 7.84  | 8.11  | 8.63  | 9.09  |
|                               | 6 <sup>1</sup> A'              | R    | 6.89                               | 7.55 | 8.18  | 8.48  | 8.78  | 9.11  | 9.53  |
| acetone                       | 7 <sup>1</sup> A'              | R    | 7.04                               | 7.75 | 8.44  | 8.78  | 9.03  | 9.37  | 10.01 |
|                               | 1 <sup>1</sup> A <sub>2</sub>  | V    | 4.23                               | 4.40 | 4.61  | 4.64  | 4.72  | 4.87  | 5.19  |
|                               | 1 <sup>1</sup> B <sub>2</sub>  | R    | 4.96                               | 5.50 | 5.99  | 6.24  | 6.47  | 6.91  | 7.31  |
|                               | 2 <sup>1</sup> A <sub>2</sub>  | R    | 5.92                               | 6.55 | 7.14  | 7.44  | 7.62  | 7.66  | 7.89  |
|                               | 2 <sup>1</sup> A <sub>1</sub>  | R    | 5.78                               | 6.43 | 7.02  | 7.31  | 7.59  | 8.10  | 8.59  |
|                               | 2 <sup>1</sup> B <sub>2</sub>  | R    | 6.03                               | 6.69 | 7.31  | 7.62  | 7.91  | 8.43  | 8.90  |
|                               | 3 <sup>1</sup> A <sub>1</sub>  | R    | 6.51                               | 7.20 | 7.85  | 8.17  | 8.46  | 9.01  | 9.47  |
|                               | 3 <sup>1</sup> B <sub>2</sub>  | R    | 6.27                               | 6.91 | 7.48  | 7.77  | 8.03  | 8.55  | 8.97  |
| 1 <sup>1</sup> B <sub>1</sub> | R                              | 6.56 | 7.27                               | 7.95 | 8.26  | 8.33  | 8.40  | 8.63  |       |
| ethylene                      | 1 <sup>1</sup> B <sub>3u</sub> | R    | 6.44                               | 6.84 | 7.20  | 7.40  | 7.57  | 7.91  | 8.05  |
|                               | 1 <sup>1</sup> B <sub>1u</sub> | V    | 7.64                               | 7.96 | 8.18  | 8.31  | 8.40  | 8.53  | 8.53  |
|                               | 1 <sup>1</sup> B <sub>1g</sub> | R    | 6.98                               | 7.44 | 7.78  | 7.81  | 7.84  | 7.89  | 8.17  |
|                               | 1 <sup>1</sup> B <sub>2g</sub> | R    | 6.95                               | 7.43 | 7.87  | 8.11  | 8.32  | 8.74  | 8.99  |
|                               | 2 <sup>1</sup> A <sub>g</sub>  | R    | 7.39                               | 7.79 | 8.16  | 8.37  | 8.56  | 8.93  | 9.24  |
|                               | 2 <sup>1</sup> B <sub>3u</sub> | R    | 7.77                               | 8.27 | 8.68  | 8.90  | 9.09  | 9.43  | 9.67  |
|                               | 3 <sup>1</sup> B <sub>3u</sub> | R    | 7.96                               | 8.40 | 8.85  | 9.10  | 9.34  | 9.81  | 10.21 |
|                               | 4 <sup>1</sup> B <sub>3u</sub> | R    | 8.26                               | 8.75 | 9.23  | 9.50  | 9.75  | 10.24 | 10.80 |
|                               | 3 <sup>1</sup> B <sub>1g</sub> | R    | 8.55                               | 9.02 | 9.45  | 9.68  | 9.89  | 10.30 | 10.72 |
|                               | 2 <sup>1</sup> B <sub>1u</sub> | R    | 8.64                               | 9.00 | 9.36  | 9.58  | 9.78  | 10.19 | 10.71 |
|                               | 5 <sup>1</sup> B <sub>3u</sub> | R    | 9.28                               | 9.74 | 10.15 | 10.38 | 10.59 | 10.99 | 11.45 |
| isobutene                     | <sup>1</sup> B <sub>1</sub>    | R    | 5.36                               | 5.73 | 6.08  | 6.25  | 6.40  | 6.71  | 6.85  |
|                               | <sup>1</sup> A <sub>1</sub>    | R    | 6.07                               | 6.47 | 6.82  | 6.98  | 7.12  | 7.37  | 7.53  |
|                               | 1 <sup>1</sup> B <sub>u</sub>  | V    | 5.74                               | 5.87 | 5.96  | 6.02  | 6.06  | 6.13  | 6.12  |

|                               |             |   |      |      |      |      |      |      |      |
|-------------------------------|-------------|---|------|------|------|------|------|------|------|
| trans-butadiene               | $1^1B_g$    | R | 5.52 | 5.90 | 6.23 | 6.42 | 6.59 | 6.91 | 7.01 |
|                               | $2^1A_u$    | R | 5.83 | 6.24 | 6.61 | 6.77 | 6.96 | 7.30 | 7.44 |
|                               | $2^1B_u$    | R | 6.67 | 6.95 | 7.23 | 7.41 | 7.57 | 7.88 | 8.13 |
|                               | $2^1B_g$    | R | 6.51 | 6.97 | 7.38 | 7.61 | 7.72 | 7.76 | 8.02 |
|                               | $3^1A_g$    | R | 6.85 | 7.23 | 7.57 | 7.78 | 7.96 | 8.30 | 8.49 |
|                               | $3^1B_u$    | R | 7.50 | 7.93 | 8.33 | 8.56 | 8.77 | 9.17 | 9.57 |
| pyridine                      | $1^1B_1$    | V | 4.34 | 4.43 | 4.52 | 4.57 | 4.61 | 4.69 | 4.96 |
|                               | $1^1B_2$    | V | 5.46 | 5.49 | 5.51 | 5.55 | 5.56 | 5.59 | 5.58 |
|                               | $1^1A_2$    | V | 4.40 | 4.52 | 4.63 | 4.70 | 4.75 | 4.86 | 5.15 |
|                               | $1^1A_1$    | V | 6.72 | 6.73 | 6.69 | 6.73 | 6.74 | 6.76 | 6.73 |
| pyrazine                      | $1^1B_{3u}$ | V | 3.55 | 3.61 | 3.68 | 3.69 | 3.71 | 3.76 | 4.01 |
|                               | $1^1B_{2u}$ | V | 5.43 | 5.45 | 5.46 | 5.47 | 5.48 | 5.48 | 5.45 |
|                               | $1^1B_{2g}$ | V | 5.09 | 5.18 | 5.31 | 5.31 | 5.35 | 5.43 | 5.64 |
|                               | $1^1B_{1g}$ | V | 5.53 | 5.66 | 5.81 | 5.86 | 5.93 | 6.05 | 6.32 |
|                               | $1^1B_{1u}$ | V | 6.96 | 6.98 | 6.95 | 6.98 | 7.00 | 7.02 | 7.00 |
| pyridazine                    | $1^1B_1$    | V | 3.09 | 3.19 | 3.26 | 3.33 | 3.38 | 3.47 | 3.76 |
|                               | $1^1A_1$    | V | 5.56 | 5.60 | 5.63 | 5.65 | 5.67 | 5.70 | 5.69 |
|                               | $1^1A_2$    | V | 4.97 | 5.05 | 5.16 | 5.16 | 5.20 | 5.26 | 5.50 |
|                               | $1^1B_1$    | V | 5.37 | 5.48 | 5.59 | 5.63 | 5.69 | 5.78 | 6.05 |
|                               | $1^1B_2$    | V | 6.77 | 6.75 | 6.83 | 6.73 | 6.78 | 6.80 | 6.73 |
| pyrimidine                    | $1^1B_1$    | V | 3.71 | 3.80 | 3.89 | 3.94 | 3.98 | 4.07 | 4.35 |
|                               | $1^1A_2$    | V | 3.93 | 4.05 | 4.15 | 4.22 | 4.28 | 4.38 | 4.69 |
|                               | $1^1B_2$    | V | 5.69 | 5.74 | 5.77 | 5.80 | 5.81 | 5.85 | 5.86 |
|                               | $1^1A_2$    | V | 5.05 | 5.14 | 5.22 | 5.26 | 5.30 | 5.38 | 5.63 |
|                               | $1^1B_1$    | V | 5.28 | 5.39 | 5.49 | 5.55 | 5.60 | 5.70 | 5.98 |
|                               | $1^1A_1$    | V | 6.96 | 6.95 | 6.94 | 6.99 | 7.01 | 7.03 | 7.01 |
| s-tetrazine                   | $1^1B_{3u}$ | V | 1.77 | 1.84 | 1.90 | 1.93 | 1.96 | 2.02 | 2.29 |
|                               | $1^1A_u$    | V | 2.77 | 2.89 | 2.95 | 3.06 | 3.11 | 3.21 | 3.55 |
|                               | $1^1A_u$    | V | 4.58 | 4.61 | 4.70 | 4.66 | 4.67 | 4.70 | 4.90 |
|                               | $1^1B_{3u}$ | V | 5.60 | 5.69 | 5.79 | 5.82 | 5.87 | 5.95 | 6.22 |
| Mean absolute error (total)   |             |   | 0.83 | 0.50 | 0.25 | 0.26 | 0.37 | 0.60 | 0.85 |
| Mean absolute error (valence) |             |   | 0.42 | 0.36 | 0.33 | 0.33 | 0.33 | 0.33 | 0.36 |
| Mean absolute error (Rydberg) |             |   | 1.14 | 0.61 | 0.19 | 0.21 | 0.40 | 0.80 | 1.23 |

## 6. Caricato set – TDDFT results from PBE0KLI-0.4 and PBE0HF-0.4

**Table S6.** The excitation energies of the Caricato set calculated using PBE0KLI-0.4. The third column indicates excitation types: V and R for vertical and Rydberg excitations, respectively. Experimental values were obtained from [M. Caricato, G. W. Trucks, M. J. Frisch, K. B. Wiberg, *J. Chem. Theory Comput.* **2010**, 6 (2), 370–383]. Unit: eV

| Molecule                       | State                          | Type  | PBE0KLI-0.4<br>(Orbital energy gaps) | PBE0KLI-0.4<br>w/ LDA kernel<br>(TDDFT) | the portion of the major configuration in TDDFT calculation ( $ c ^2$ ) | Expt. |
|--------------------------------|--------------------------------|-------|--------------------------------------|-----------------------------------------|-------------------------------------------------------------------------|-------|
| formaldehyde                   | 1 <sup>1</sup> A <sub>2</sub>  | V     | 3.76                                 | 4.07                                    | 1.00                                                                    | 4.00  |
|                                | 1 <sup>1</sup> B <sub>2</sub>  | R     | 6.95                                 | 6.95                                    | 1.00                                                                    | 7.08  |
|                                | 2 <sup>1</sup> B <sub>2</sub>  | R     | 7.76                                 | 7.79                                    | 0.99                                                                    | 7.97  |
|                                | 2 <sup>1</sup> A <sub>1</sub>  | R     | 7.90                                 | 7.90                                    | 0.99                                                                    | 8.14  |
|                                | 2 <sup>1</sup> A <sub>2</sub>  | R     | 8.12                                 | 8.08                                    | 1.00                                                                    | 8.37  |
|                                | 3 <sup>1</sup> B <sub>2</sub>  | R     | 8.74                                 | 8.80                                    | 0.97                                                                    | 8.88  |
|                                | 1 <sup>1</sup> B <sub>1</sub>  | V     | 8.47                                 | 8.96                                    | 0.94                                                                    | 9.00  |
|                                | 3 <sup>1</sup> A <sub>2</sub>  | R     | 9.14                                 | 9.11                                    | 1.00                                                                    | 9.22  |
|                                | 4 <sup>1</sup> B <sub>2</sub>  | R     | 9.04                                 | 9.01                                    | 1.00                                                                    | 9.26  |
|                                | 4 <sup>1</sup> A <sub>1</sub>  | R     | 9.64                                 | 9.68                                    | 0.96                                                                    | 9.58  |
| 5 <sup>1</sup> B <sub>2</sub>  | R                              | 9.20  | 9.20                                 | 0.98                                    | 9.63                                                                    |       |
| acetaldehyde                   | 1 <sup>1</sup> A''             | V     | 4.14                                 | 4.44                                    | 1.00                                                                    | 4.28  |
|                                | 2 <sup>1</sup> A'              | R     | 6.42                                 | 6.50                                    | 0.99                                                                    | 6.82  |
|                                | 3 <sup>1</sup> A'              | R     | 7.12                                 | 7.15                                    | 0.99                                                                    | 7.46  |
|                                | 4 <sup>1</sup> A'              | R     | 7.55                                 | 7.55                                    | 0.98                                                                    | 7.75  |
|                                | 6 <sup>1</sup> A'              | R     | 8.19                                 | 8.18                                    | 0.98                                                                    | 8.43  |
|                                | 7 <sup>1</sup> A'              | R     | 8.47                                 | 8.44                                    | 0.99                                                                    | 8.69  |
| acetone                        | 1 <sup>1</sup> A <sub>2</sub>  | V     | 4.32                                 | 4.61                                    | 1.00                                                                    | 4.43  |
|                                | 1 <sup>1</sup> B <sub>2</sub>  | R     | 5.97                                 | 5.99                                    | 1.00                                                                    | 6.36  |
|                                | 2 <sup>1</sup> A <sub>2</sub>  | R     | 7.14                                 | 7.14                                    | 1.00                                                                    | 7.36  |
|                                | 2 <sup>1</sup> A <sub>1</sub>  | R     | 6.96                                 | 7.02                                    | 0.98                                                                    | 7.41  |
|                                | 2 <sup>1</sup> B <sub>2</sub>  | R     | 7.31                                 | 7.31                                    | 1.00                                                                    | 7.49  |
|                                | 3 <sup>1</sup> A <sub>1</sub>  | R     | 7.85                                 | 7.85                                    | 1.00                                                                    | 7.80  |
|                                | 3 <sup>1</sup> B <sub>2</sub>  | R     | 7.45                                 | 7.48                                    | 0.99                                                                    | 8.09  |
|                                | 1 <sup>1</sup> B <sub>1</sub>  | R     | 7.96                                 | 7.95                                    | 0.99                                                                    | 8.17  |
| ethylene                       | 1 <sup>1</sup> B <sub>3u</sub> | R     | 7.21                                 | 7.20                                    | 1.00                                                                    | 7.11  |
|                                | 1 <sup>1</sup> B <sub>1u</sub> | V     | 5.79                                 | 8.18                                    | 0.69                                                                    | 7.65  |
|                                | 1 <sup>1</sup> B <sub>1g</sub> | R     | 7.89                                 | 7.78                                    | 0.74                                                                    | 7.80  |
|                                | 1 <sup>1</sup> B <sub>2g</sub> | R     | 7.86                                 | 7.87                                    | 1.00                                                                    | 7.90  |
|                                | 2 <sup>1</sup> A <sub>g</sub>  | R     | 8.10                                 | 8.16                                    | 0.99                                                                    | 8.28  |
|                                | 2 <sup>1</sup> B <sub>3u</sub> | R     | 8.68                                 | 8.68                                    | 0.99                                                                    | 8.62  |
|                                | 3 <sup>1</sup> B <sub>3u</sub> | R     | 8.86                                 | 8.85                                    | 0.99                                                                    | 8.90  |
|                                | 4 <sup>1</sup> B <sub>3u</sub> | R     | 9.23                                 | 9.23                                    | 1.00                                                                    | 9.08  |
|                                | 3 <sup>1</sup> B <sub>1g</sub> | R     | 9.44                                 | 9.45                                    | 1.00                                                                    | 9.20  |
|                                | 2 <sup>1</sup> B <sub>1u</sub> | R     | 9.06                                 | 9.36                                    | 0.69                                                                    | 9.33  |
| 5 <sup>1</sup> B <sub>3u</sub> | R                              | 10.12 | 10.15                                | 0.92                                    | 9.51                                                                    |       |

|                               |                              |   |       |       |                                       |      |
|-------------------------------|------------------------------|---|-------|-------|---------------------------------------|------|
| isobutene                     | <sup>1</sup> B <sub>1</sub>  | R | 6.08  | 6.08  | 1.00                                  | 6.17 |
|                               | <sup>1</sup> A <sub>1</sub>  | R | 5.43  | 6.82  | 0.52                                  | 6.70 |
| trans-butadiene               | <sup>1</sup> B <sub>u</sub>  | V | 4.02  | 5.96  | 0.82                                  | 5.91 |
|                               | <sup>1</sup> B <sub>g</sub>  | R | 6.26  | 6.23  | 1.00                                  | 6.22 |
|                               | <sup>2</sup> A <sub>u</sub>  | R | 6.60  | 6.61  | 0.99                                  | 6.66 |
|                               | <sup>2</sup> B <sub>u</sub>  | R | 7.04  | 7.23  | 0.87                                  | 7.07 |
|                               | <sup>2</sup> B <sub>g</sub>  | R | 7.40  | 7.38  | 0.99                                  | 7.36 |
|                               | <sup>3</sup> A <sub>g</sub>  | R | 7.58  | 7.57  | 0.96                                  | 7.62 |
|                               | <sup>3</sup> B <sub>u</sub>  | R | 8.36  | 8.33  | 0.99                                  | 8.00 |
| pyridine                      | <sup>1</sup> B <sub>1</sub>  | V | 4.18  | 4.52  | 0.99                                  | 4.59 |
|                               | <sup>1</sup> B <sub>2</sub>  | V | 4.83  | 5.51  | 0.67                                  | 4.99 |
|                               | <sup>1</sup> A <sub>2</sub>  | V | 4.58  | 4.63  | 1.00                                  | 5.43 |
|                               | <sup>1</sup> A <sub>1</sub>  | V | 5.23  | 6.69  | 0.55                                  | 6.38 |
| pyrazine                      | <sup>1</sup> B <sub>3u</sub> | V | 3.32  | 3.68  | 1.00                                  | 3.83 |
|                               | <sup>1</sup> B <sub>2u</sub> | V | 4.43  | 5.46  | 0.80                                  | 4.81 |
|                               | <sup>1</sup> B <sub>2g</sub> | V | 4.89  | 5.31  | 0.98                                  | 5.46 |
|                               | <sup>1</sup> B <sub>1g</sub> | V | 5.74  | 5.81  | 1.00                                  | 6.10 |
|                               | <sup>1</sup> B <sub>1u</sub> | V | 5.82  | 6.95  | 0.61                                  | 6.51 |
| pyridazine                    | <sup>1</sup> B <sub>1</sub>  | V | 2.87  | 3.26  | 0.99                                  | 3.60 |
|                               | <sup>1</sup> A <sub>1</sub>  | V | 4.90  | 5.63  | 0.64                                  | 5.00 |
|                               | <sup>1</sup> A <sub>2</sub>  | V | 4.88  | 5.16  | 0.99                                  | 5.30 |
|                               | <sup>1</sup> B <sub>1</sub>  | V | 5.49  | 5.59  | 0.99                                  | 6.00 |
|                               | <sup>1</sup> B <sub>2</sub>  | V | 5.52  | 6.83  | 0.37                                  | 6.50 |
| pyrimidine                    | <sup>1</sup> B <sub>1</sub>  | V | 3.67  | 3.89  | 0.99                                  | 3.85 |
|                               | <sup>1</sup> A <sub>2</sub>  | V | 4.06  | 4.15  | 0.98                                  | 4.62 |
|                               | <sup>1</sup> B <sub>2</sub>  | V | 5.03  | 5.77  | 0.66                                  | 5.12 |
|                               | <sup>1</sup> A <sub>2</sub>  | V | 4.91  | 5.22  | 0.97                                  | 5.52 |
|                               | <sup>1</sup> B <sub>1</sub>  | V | 5.30  | 5.49  | 0.99                                  | 5.90 |
|                               | <sup>1</sup> A <sub>1</sub>  | V | 5.42  | 6.94  | 0.54                                  | 6.70 |
| s-tetrazine                   | <sup>1</sup> B <sub>3u</sub> | V | 1.55  | 1.90  | 1.00                                  | 2.25 |
|                               | <sup>1</sup> A <sub>u</sub>  | V | 2.83  | 2.95  | 0.99                                  | 3.40 |
|                               | <sup>1</sup> A <sub>u</sub>  | V | 4.38  | 4.70  | 0.99                                  | 5.00 |
|                               | <sup>1</sup> B <sub>3u</sub> | V | 5.65  | 5.79  | 0.99                                  | 6.34 |
| Mean absolute error (total)   |                              |   | 0.399 | 0.253 | Average of  c  <sup>2</sup> :<br>0.92 |      |
| Mean absolute error (valence) |                              |   | 0.617 | 0.334 |                                       |      |
| Mean absolute error (Rydberg) |                              |   | 0.231 | 0.191 |                                       |      |

**Table S7.** The excitation energies of the Caricato set calculated using PBE0HF-0.4. The third column indicates excitation types: V and R for vertical and Rydberg excitations, respectively. Experimental values were obtained from [M. Caricato, G. W. Trucks, M. J. Frisch, K. B. Wiberg, *J. Chem. Theory Comput.* **2010**, 6 (2), 370–383]. Unit: eV

| Molecule     | State                          | Type | PBE0HF-0.4 (Orbital energy gaps) | PBE0HF-0.4 (TDDFT) | the portion of the major configuration in TDDFT calculation ( $ c ^2$ ) | Expt. |
|--------------|--------------------------------|------|----------------------------------|--------------------|-------------------------------------------------------------------------|-------|
| formaldehyde | 1 <sup>1</sup> A <sub>2</sub>  | V    | 8.08                             | 3.98               | 0.96                                                                    | 4.00  |
|              | 1 <sup>1</sup> B <sub>2</sub>  | R    | 8.83                             | 7.25               | 0.61                                                                    | 7.08  |
|              | 2 <sup>1</sup> B <sub>2</sub>  | R    | 9.07                             | 7.99               | 0.34                                                                    | 7.97  |
|              | 2 <sup>1</sup> A <sub>1</sub>  | R    | 9.02                             | 8.04               | 0.39                                                                    | 8.14  |
|              | 2 <sup>1</sup> A <sub>2</sub>  | R    | 9.10                             | 8.22               | 0.53                                                                    | 8.37  |
|              | 3 <sup>1</sup> B <sub>2</sub>  | R    | 9.12                             | 8.45               | 0.38                                                                    | 8.88  |
|              | 1 <sup>1</sup> B <sub>1</sub>  | V    | 13.25                            | 9.17               | 0.96                                                                    | 9.00  |
|              | 3 <sup>1</sup> A <sub>2</sub>  | R    | 9.65                             | 8.72               | 0.46                                                                    | 9.22  |
|              | 4 <sup>1</sup> B <sub>2</sub>  | R    | 9.50                             | 8.64               | 0.67                                                                    | 9.26  |
|              | 4 <sup>1</sup> A <sub>1</sub>  | R    | 9.57                             | 8.75               | 0.62                                                                    | 9.58  |
|              | 5 <sup>1</sup> B <sub>2</sub>  | R    | 9.61                             | 8.78               | 0.41                                                                    | 9.63  |
| acetaldehyde | 1 <sup>1</sup> A''             | V    | 8.37                             | 4.33               | 0.97                                                                    | 4.28  |
|              | 2 <sup>1</sup> A'              | R    | 8.45                             | 7.04               | 0.63                                                                    | 6.82  |
|              | 3 <sup>1</sup> A'              | R    | 8.65                             | 7.58               | 0.23                                                                    | 7.46  |
|              | 4 <sup>1</sup> A'              | R    | 8.70                             | 7.79               | 0.20                                                                    | 7.75  |
|              | 6 <sup>1</sup> A'              | R    | 8.87                             | 8.23               | 0.41                                                                    | 8.43  |
|              | 7 <sup>1</sup> A'              | R    | 8.87                             | 8.26               | 0.29                                                                    | 8.69  |
| acetone      | 1 <sup>1</sup> A <sub>2</sub>  | V    | 8.31                             | 4.50               | 0.49                                                                    | 4.43  |
|              | 1 <sup>1</sup> B <sub>2</sub>  | R    | 8.11                             | 6.68               | 0.73                                                                    | 6.36  |
|              | 2 <sup>1</sup> A <sub>2</sub>  | R    | 8.42                             | 7.50               | 0.35                                                                    | 7.36  |
|              | 2 <sup>1</sup> A <sub>1</sub>  | R    | 8.36                             | 7.48               | 0.44                                                                    | 7.41  |
|              | 2 <sup>1</sup> B <sub>2</sub>  | R    | 8.40                             | 7.55               | 0.34                                                                    | 7.49  |
|              | 3 <sup>1</sup> A <sub>1</sub>  | R    | 8.50                             | 7.96               | 0.54                                                                    | 7.80  |
|              | 3 <sup>1</sup> B <sub>2</sub>  | R    | 8.41                             | 7.79               | 0.25                                                                    | 8.09  |
|              | 1 <sup>1</sup> B <sub>1</sub>  | R    | 8.49                             | 7.98               | 0.67                                                                    | 8.17  |
| ethylene     | 1 <sup>1</sup> B <sub>3u</sub> | R    | 8.53                             | 7.04               | 0.49                                                                    | 7.11  |
|              | 1 <sup>1</sup> B <sub>1u</sub> | V    | 8.87                             | 7.53               | 0.70                                                                    | 7.65  |
|              | 1 <sup>1</sup> B <sub>1g</sub> | R    | 8.65                             | 7.59               | 0.44                                                                    | 7.80  |
|              | 1 <sup>1</sup> B <sub>2g</sub> | R    | 8.65                             | 7.63               | 0.47                                                                    | 7.90  |
|              | 2 <sup>1</sup> A <sub>g</sub>  | R    | 8.76                             | 7.87               | 0.67                                                                    | 8.28  |
|              | 2 <sup>1</sup> B <sub>3u</sub> | R    | 8.76                             | 8.10               | 0.50                                                                    | 8.62  |
|              | 3 <sup>1</sup> B <sub>3u</sub> | R    | 8.89                             | 8.26               | 0.78                                                                    | 8.90  |
|              | 4 <sup>1</sup> B <sub>3u</sub> | R    | 9.25                             | 8.40               | 0.46                                                                    | 9.08  |
|              | 3 <sup>1</sup> B <sub>1g</sub> | R    | 8.92                             | 8.30               | 0.66                                                                    | 9.20  |
|              | 2 <sup>1</sup> B <sub>1u</sub> | R    | 9.00                             | 8.32               | 0.69                                                                    | 9.33  |
|              | 5 <sup>1</sup> B <sub>3u</sub> | R    | 9.80                             | 8.71               | 0.72                                                                    | 9.51  |
| isobutene    | <sup>1</sup> B <sub>1</sub>    | R    | 7.62                             | 6.22               | 0.63                                                                    | 6.17  |
|              | <sup>1</sup> A <sub>1</sub>    | R    | 7.80                             | 6.68               | 0.29                                                                    | 6.70  |

|                               |             |   |       |       |                              |      |
|-------------------------------|-------------|---|-------|-------|------------------------------|------|
| trans-butadiene               | $1^1B_u$    | V | 6.93  | 5.77  | 0.98                         | 5.91 |
|                               | $1^1B_g$    | R | 7.37  | 6.10  | 0.54                         | 6.22 |
|                               | $2^1A_u$    | R | 7.48  | 6.37  | 0.42                         | 6.66 |
|                               | $2^1B_u$    | R | 7.60  | 6.82  | 0.71                         | 7.07 |
|                               | $2^1B_g$    | R | 7.57  | 6.97  | 0.33                         | 7.36 |
|                               | $3^1A_g$    | R | 7.74  | 7.12  | 0.75                         | 7.62 |
|                               | $3^1B_u$    | R | 7.88  | 7.28  | 0.44                         | 8.00 |
| pyridine                      | $1^1B_1$    | V | 8.05  | 5.11  | 0.97                         | 4.59 |
|                               | $1^1B_2$    | V | 7.80  | 5.64  | 0.77                         | 4.99 |
|                               | $1^1A_2$    | V | 8.44  | 5.67  | 0.99                         | 5.43 |
|                               | $1^1A_1$    | V | 8.20  | 6.38  | 0.64                         | 6.38 |
| pyrazine                      | $1^1B_{3u}$ | V | 7.22  | 4.21  | 0.99                         | 3.83 |
|                               | $1^1B_{2u}$ | V | 7.46  | 5.46  | 0.90                         | 4.81 |
|                               | $1^1B_{2g}$ | V | 9.10  | 5.92  | 0.95                         | 5.46 |
|                               | $1^1B_{1g}$ | V | 9.93  | 7.23  | 0.96                         | 6.10 |
|                               | $1^1B_{1u}$ | V | 9.09  | 6.57  | 0.77                         | 6.51 |
| pyridazine                    | $1^1B_1$    | V | 6.90  | 3.89  | 0.98                         | 3.60 |
|                               | $1^1A_1$    | V | 8.00  | 5.78  | 0.74                         | 5.00 |
|                               | $1^1A_2$    | V | 8.90  | 5.86  | 0.97                         | 5.30 |
|                               | $1^1B_1$    | V | 9.53  | 6.66  | 0.97                         | 6.00 |
|                               | $1^1B_2$    | V | 8.63  | 6.51  | 0.54                         | 6.50 |
| pyrimidine                    | $1^1B_1$    | V | 7.60  | 4.63  | 0.99                         | 3.85 |
|                               | $1^1A_2$    | V | 7.99  | 5.08  | 0.98                         | 4.62 |
|                               | $1^1B_2$    | V | 8.13  | 5.91  | 0.76                         | 5.12 |
|                               | $1^1A_2$    | V | 9.01  | 6.12  | 0.97                         | 5.52 |
|                               | $1^1B_1$    | V | 9.39  | 6.53  | 0.98                         | 5.90 |
|                               | $1^1A_1$    | V | 8.51  | 6.68  | 0.73                         | 6.70 |
| s-tetrazine                   | $1^1B_{3u}$ | V | 5.68  | 2.51  | 1.00                         | 2.25 |
|                               | $1^1A_u$    | V | 6.99  | 4.03  | 0.99                         | 3.40 |
|                               | $1^1A_u$    | V | 8.53  | 5.45  | 0.99                         | 5.00 |
|                               | $1^1B_{3u}$ | V | 9.84  | 6.90  | 0.99                         | 6.34 |
| Mean absolute error (total)   |             |   | 1.743 | 0.376 | Average of $ c ^2$ :<br>0.67 |      |
| Mean absolute error (valence) |             |   | 3.142 | 0.405 |                              |      |
| Mean absolute error (Rydberg) |             |   | 0.667 | 0.353 |                              |      |



## 7. Caricato set – Orbital energy gaps and TDDFT results from BH&H (KLI)

**Table S8.** The excitation energies of the Caricato set calculated using BH&H (KLI). The third column indicates excitation types: V and R for vertical and Rydberg excitations, respectively. Experimental values were obtained from [M. Caricato, G. W. Trucks, M. J. Frisch, K. B. Wiberg, *J. Chem. Theory Comput.* **2010**, 6 (2), 370–383]. Unit: eV

| Molecule     | State                          | Type | BH&H (KLI)<br>(Orbital energy gaps) | BH&H (KLI)<br>w/ LDA kernel<br>(TDDFT) | Expt. |
|--------------|--------------------------------|------|-------------------------------------|----------------------------------------|-------|
| formaldehyde | 1 <sup>1</sup> A <sub>2</sub>  | V    | 3.73                                | 4.05                                   | 4.00  |
|              | 1 <sup>1</sup> B <sub>2</sub>  | R    | 6.89                                | 6.90                                   | 7.08  |
|              | 2 <sup>1</sup> B <sub>2</sub>  | R    | 7.66                                | 7.71                                   | 7.97  |
|              | 2 <sup>1</sup> A <sub>1</sub>  | R    | 7.91                                | 7.92                                   | 8.14  |
|              | 2 <sup>1</sup> A <sub>2</sub>  | R    | 8.13                                | 8.09                                   | 8.37  |
|              | 3 <sup>1</sup> B <sub>2</sub>  | R    | 8.74                                | 8.82                                   | 8.88  |
|              | 1 <sup>1</sup> B <sub>1</sub>  | V    | 8.49                                | 9.00                                   | 9.00  |
|              | 3 <sup>1</sup> A <sub>2</sub>  | R    | 9.22                                | 9.19                                   | 9.22  |
|              | 4 <sup>1</sup> B <sub>2</sub>  | R    | 9.09                                | 9.06                                   | 9.26  |
|              | 4 <sup>1</sup> A <sub>1</sub>  | R    | 9.71                                | 9.75                                   | 9.58  |
|              | 5 <sup>1</sup> B <sub>2</sub>  | R    | 9.29                                | 9.28                                   | 9.63  |
| acetaldehyde | 1 <sup>1</sup> A''             | V    | 4.18                                | 4.47                                   | 4.28  |
|              | 2 <sup>1</sup> A'              | R    | 6.34                                | 6.43                                   | 6.82  |
|              | 3 <sup>1</sup> A'              | R    | 7.10                                | 7.14                                   | 7.46  |
|              | 4 <sup>1</sup> A'              | R    | 7.51                                | 7.53                                   | 7.75  |
|              | 6 <sup>1</sup> A'              | R    | 8.20                                | 8.19                                   | 8.43  |
|              | 7 <sup>1</sup> A'              | R    | 8.53                                | 8.51                                   | 8.69  |
| acetone      | 1 <sup>1</sup> A <sub>2</sub>  | V    | 4.39                                | 4.67                                   | 4.43  |
|              | 1 <sup>1</sup> B <sub>2</sub>  | R    | 5.85                                | 5.88                                   | 6.36  |
|              | 2 <sup>1</sup> A <sub>2</sub>  | R    | 7.15                                | 7.15                                   | 7.36  |
|              | 2 <sup>1</sup> A <sub>1</sub>  | R    | 6.96                                | 7.04                                   | 7.41  |
|              | 2 <sup>1</sup> B <sub>2</sub>  | R    | 7.30                                | 7.31                                   | 7.49  |
|              | 3 <sup>1</sup> A <sub>1</sub>  | R    | 7.89                                | 7.90                                   | 7.80  |
|              | 3 <sup>1</sup> B <sub>2</sub>  | R    | 7.45                                | 7.48                                   | 8.09  |
|              | 1 <sup>1</sup> B <sub>1</sub>  | R    | 8.03                                | 8.02                                   | 8.17  |
| ethylene     | 1 <sup>1</sup> B <sub>3u</sub> | R    | 7.08                                | 7.08                                   | 7.11  |
|              | 1 <sup>1</sup> B <sub>1u</sub> | V    | 5.75                                | 8.05                                   | 7.65  |
|              | 1 <sup>1</sup> B <sub>1g</sub> | R    | 7.84                                | 7.66                                   | 7.80  |
|              | 1 <sup>1</sup> B <sub>2g</sub> | R    | 7.80                                | 7.81                                   | 7.90  |
|              | 2 <sup>1</sup> A <sub>g</sub>  | R    | 8.04                                | 8.12                                   | 8.28  |
|              | 2 <sup>1</sup> B <sub>3u</sub> | R    | 8.60                                | 8.60                                   | 8.62  |
|              | 3 <sup>1</sup> B <sub>3u</sub> | R    | 8.84                                | 8.83                                   | 8.90  |
|              | 4 <sup>1</sup> B <sub>3u</sub> | R    | 9.22                                | 9.23                                   | 9.08  |
|              | 3 <sup>1</sup> B <sub>1g</sub> | R    | 9.42                                | 9.43                                   | 9.20  |
|              | 2 <sup>1</sup> B <sub>1u</sub> | R    | 9.07                                | 9.33                                   | 9.33  |
|              | 5 <sup>1</sup> B <sub>3u</sub> | R    | 10.04                               | 10.07                                  | 9.51  |
| isobutene    | <sup>1</sup> B <sub>1</sub>    | R    | 5.88                                | 5.89                                   | 6.17  |
|              | <sup>1</sup> A <sub>1</sub>    | R    | 5.39                                | 6.71                                   | 6.70  |

|                               |             |   |       |       |      |
|-------------------------------|-------------|---|-------|-------|------|
| trans-butadiene               | $1^1B_u$    | V | 4.01  | 5.87  | 5.91 |
|                               | $1^1B_g$    | R | 6.12  | 6.09  | 6.22 |
|                               | $2^1A_u$    | R | 6.49  | 6.50  | 6.66 |
|                               | $2^1B_u$    | R | 6.95  | 7.17  | 7.07 |
|                               | $2^1B_g$    | R | 7.32  | 7.31  | 7.36 |
|                               | $3^1A_g$    | R | 7.50  | 7.51  | 7.62 |
|                               | $3^1B_u$    | R | 8.30  | 8.27  | 8.00 |
| pyridine                      | $1^1B_1$    | V | 4.19  | 4.53  | 4.59 |
|                               | $1^1B_2$    | V | 4.81  | 5.49  | 4.99 |
|                               | $1^1A_2$    | V | 4.60  | 4.65  | 5.43 |
|                               | $1^1A_1$    | V | 5.22  | 6.63  | 6.38 |
| pyrazine                      | $1^1B_{3u}$ | V | 3.31  | 3.66  | 3.83 |
|                               | $1^1B_{2u}$ | V | 4.41  | 5.43  | 4.81 |
|                               | $1^1B_{2g}$ | V | 4.91  | 5.33  | 5.46 |
|                               | $1^1B_{1g}$ | V | 5.78  | 5.85  | 6.10 |
|                               | $1^1B_{1u}$ | V | 5.83  | 6.89  | 6.51 |
| pyridazine                    | $1^1B_1$    | V | 2.91  | 3.29  | 3.60 |
|                               | $1^1A_1$    | V | 4.90  | 5.63  | 5.00 |
|                               | $1^1A_2$    | V | 4.90  | 5.18  | 5.30 |
|                               | $1^1B_1$    | V | 5.51  | 5.62  | 6.00 |
|                               | $1^1B_2$    | V | 5.51  | 6.79  | 6.50 |
| pyrimidine                    | $1^1B_1$    | V | 3.71  | 3.93  | 3.85 |
|                               | $1^1A_2$    | V | 4.10  | 4.19  | 4.62 |
|                               | $1^1B_2$    | V | 5.02  | 5.77  | 5.12 |
|                               | $1^1A_2$    | V | 4.92  | 5.22  | 5.52 |
|                               | $1^1B_1$    | V | 5.31  | 5.50  | 5.90 |
|                               | $1^1A_1$    | V | 5.41  | 6.89  | 6.70 |
| s-tetrazine                   | $1^1B_{3u}$ | V | 1.59  | 1.93  | 2.25 |
|                               | $1^1A_u$    | V | 2.86  | 2.98  | 3.40 |
|                               | $1^1A_u$    | V | 4.37  | 4.68  | 5.00 |
|                               | $1^1B_{3u}$ | V | 5.64  | 5.78  | 6.34 |
| Mean absolute error (total)   |             |   | 0.402 | 0.250 |      |
| Mean absolute error (valence) |             |   | 0.607 | 0.316 |      |
| Mean absolute error (Rydberg) |             |   | 0.244 | 0.199 |      |
